# Supplementary material
Source: PubMed Central journal article supplement (PMC1567686)

**A** Transgenic TCR persists on surface of PU.1-transduced fetal thymocytes

Total TCR transgenic  
GFP-high

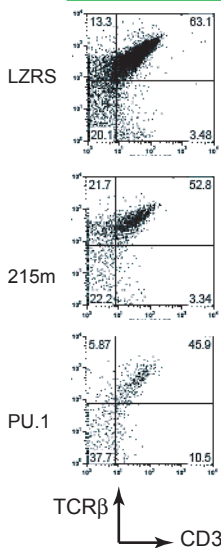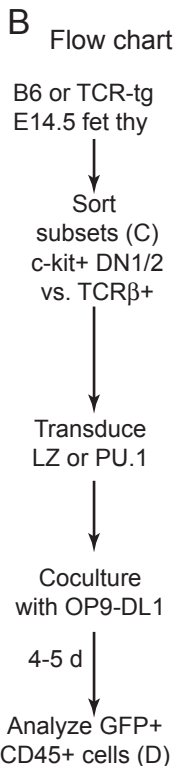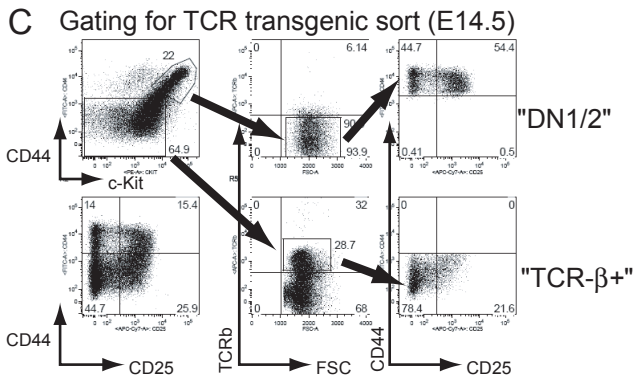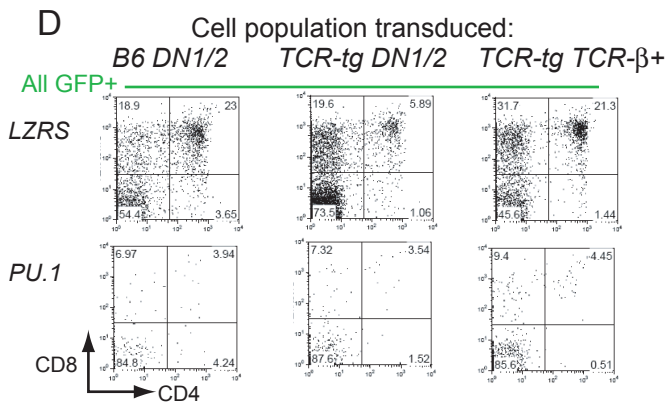

Supplement: pnas_0601188103_2.pdf [file pnas_0601188103_2.pdf]
