# Supplementary material
Source: PubMed Central journal article supplement (PMC1567686)

# Bcl2-transgenic thymocyte responses

## A Transduced cell survival: little selection against PU.1+ GFP+ cells

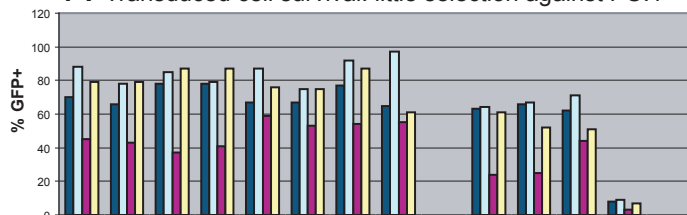

## B Generation of Mac-1+ cells

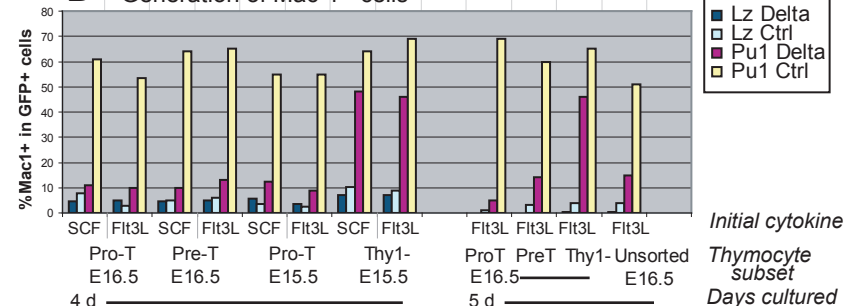

## C Generation of DP cells on OP9-DL1

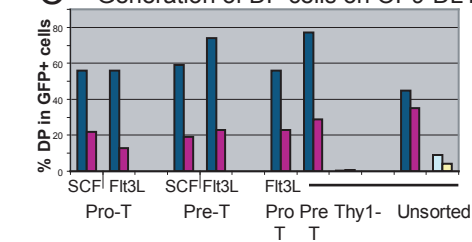

## D Bcl2-transgenic E16.5 on OP9-DL1

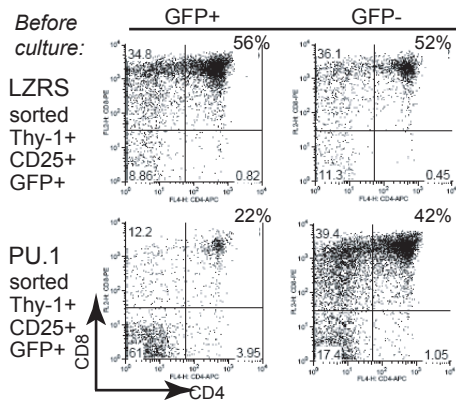

Supplement: pnas_0601188103_4.pdf [file pnas_0601188103_4.pdf]
