# Supplementary material
Source: PubMed Central journal article supplement (PMC1567686)
Supplement: pnas_0601188103_8.pdf [file pnas_0601188103_8.pdf]

**Table 1. Significance of PU.1 and Notch/DL effects on gene expression**

|              | <i>P</i> , ± DL1 effect | <i>P</i> , PU.1 effect | <i>P</i> , interx DL1 x PU.1 |  | <i>P</i> , ± PU.1 within DL1 | <i>P</i> , ± PU.1 within ctrl | <i>P</i> , ± DL1 within LZ | <i>P</i> , ± DL1 within PU.1 |
|--------------|-------------------------|------------------------|------------------------------|--|------------------------------|-------------------------------|----------------------------|------------------------------|
| Bcl11A       | 0.698                   | 0.01                   | 0.928                        |  | 0.048                        | 0.039                         | 0.735                      | 0.832                        |
| Bcl11B       | 0.036                   | <0.001                 | 0.038                        |  | 0.051                        | <0.001                        | 0.984                      | 0.008                        |
| C/EBPα       | 0.105                   | 0.863                  | 0.747                        |  | Not sign                     | Not sign                      | Not sign                   | Not sign                     |
| C/EBPβ       | 0.733                   | 0.575                  | 0.345                        |  | Not sign                     | Not sign                      | Not sign                   | Not sign                     |
| CD3ε         | 0.01                    | <0.001                 | 0.011                        |  | 0.022                        | <0.001                        | 0.971                      | 0.002                        |
| CD3γ         | 0.01                    | <0.001                 | 0.065                        |  | <0.001                       | <0.001                        | 0.418                      | 0.005                        |
| Deltex-1     | <0.001                  | 0.195                  | 0.813                        |  | 0.275                        | 0.432                         | <0.001                     | <0.001                       |
| E2A          | 0.01                    | 0.007                  | 0.949                        |  | 0.039                        | 0.034                         | 0.047                      | 0.041                        |
| Egr1         | 0.837                   | 0.778                  | 0.656                        |  | Not sign                     | Not sign                      | Not sign                   | Not sign                     |
| Egr2         | 0.497                   | 0.003                  | 0.792                        |  | 0.013                        | 0.023                         | 0.764                      | 0.506                        |
| Egr3         | <0.001                  | <0.001                 | <0.001                       |  | 0.041                        | <0.001                        | 0.003                      | <0.001                       |
| Ets1         | 0.02                    | <0.001                 | 0.024                        |  | 0.01                         | <0.001                        | 0.933                      | 0.004                        |
| Ets2         | <0.001                  | <0.001                 | 0.237                        |  | 0.001                        | <0.001                        | 0.004                      | <0.001                       |
| FOG-1        | 0.009                   | <0.001                 | 0.046                        |  | 0.022                        | <0.001                        | 0.455                      | 0.003                        |
| GATA-3       | 0.024                   | 0.659                  | 0.271                        |  | 0.622                        | 0.279                         | 0.293                      | 0.023                        |
| Gfi1         | 0.002                   | <0.001                 | 0.038                        |  | 0.043                        | <0.001                        | 0.199                      | 0.001                        |
| GM-CSFRβ     | 0.862                   | 0.004                  | 0.193                        |  | 0.115                        | 0.005                         | 0.291                      | 0.406                        |
| HEBAIt       | <0.001                  | 0.009                  | 0.949                        |  | 0.045                        | 0.039                         | 0.001                      | 0.001                        |
| HEBCan       | 0.012                   | <0.001                 | 0.01                         |  | 0.012                        | <0.001                        | 0.959                      | 0.002                        |
| HES-1        | <0.001                  | 0.009                  | 0.055                        |  | 0.433                        | 0.004                         | 0.002                      | <0.001                       |
| Id1          | 0.008                   | 0.75                   | 0.873                        |  | 0.91                         | 0.735                         | 0.031                      | 0.045                        |
| Id2          | <0.001                  | <0.001                 | 0.037                        |  | 0.092                        | 0.001                         | 0.031                      | <0.001                       |
| Id3          | 0.003                   | 0.001                  | 0.585                        |  | 0.015                        | 0.005                         | 0.011                      | 0.037                        |
| Ikaros       | 0.41                    | 0.004                  | 0.09                         |  | 0.191                        | 0.003                         | 0.474                      | 0.083                        |
| LAT          | <0.001                  | <0.001                 | 0.001                        |  | <0.001                       | <0.001                        | 0.008                      | <0.001                       |
| Lck          | <0.001                  | <0.001                 | 0.095                        |  | 0.001                        | <0.001                        | 0.008                      | <0.001                       |
| Lysozyme M   | 0.166                   | 0.682                  | 0.449                        |  | Not sign                     | Not sign                      | Not sign                   | Not sign                     |
| Mac-1        | <0.001                  | <0.001                 | <0.001                       |  | <0.001                       | <0.001                        | 0.66                       | <0.001                       |
| M-CSF-R      | 0.999                   | 0.024                  | 0.812                        |  | 0.064                        | 0.11                          | 0.867                      | 0.866                        |
| Myb          | <0.001                  | <0.001                 | 0.001                        |  | 0.033                        | <0.001                        | 0.006                      | <0.001                       |
| pTα          | <0.001                  | 0.348                  | 0.995                        |  | 0.504                        | 0.498                         | <0.001                     | <0.001                       |
| PU.1 coding* | 0.97                    | <0.001                 | 0.715                        |  | <0.001                       | <0.001                        | 0.816                      | 0.776                        |
| PU.1 endog   | 0.364                   | 0.022                  | 0.388                        |  | 0.209                        | 0.029                         | 0.222                      | 0.972                        |
| Rag-1        | 0.005                   | <0.001                 | 0.021                        |  | 0.014                        | <0.001                        | 0.509                      | 0.001                        |
| Runx1        | <0.001                  | 0.13                   | 0.152                        |  | 0.943                        | 0.05                          | <0.001                     | 0.004                        |
| Runx3        | 0.464                   | <0.001                 | 0.037                        |  | 0.109                        | 0.001                         | 0.258                      | 0.05                         |
| TCF-1        | 0.002                   | <0.001                 | 0.091                        |  | <0.001                       | <0.001                        | 0.096                      | 0.002                        |
| Zap70        | 0.263                   | 0.002                  | 0.133                        |  | 0.088                        | 0.003                         | 0.751                      | 0.076                        |

Table of *P* values determined from two-way ANOVA of data plotted in Figs. 4A and 11. Pairwise effects were calculated by Holm-Sidak method (SigmaStat 3.11). Statistically significant values ( $P < 0.05$ ) are highlighted in strong yellow ( $P < 0.03$ ) or light yellow ( $0.03 < P < 0.05$ ). Interx, statistical interaction; Ctrl, control; Not sign, not significant (pairwise comparison not calculated). Total PU.1 coding\*: Values dominated by exogenous PU.1 cDNA levels.
