# Supplementary material
Source: PubMed Central journal article supplement (PMC1567686)

# Normal E14.5 fetal thymocytes

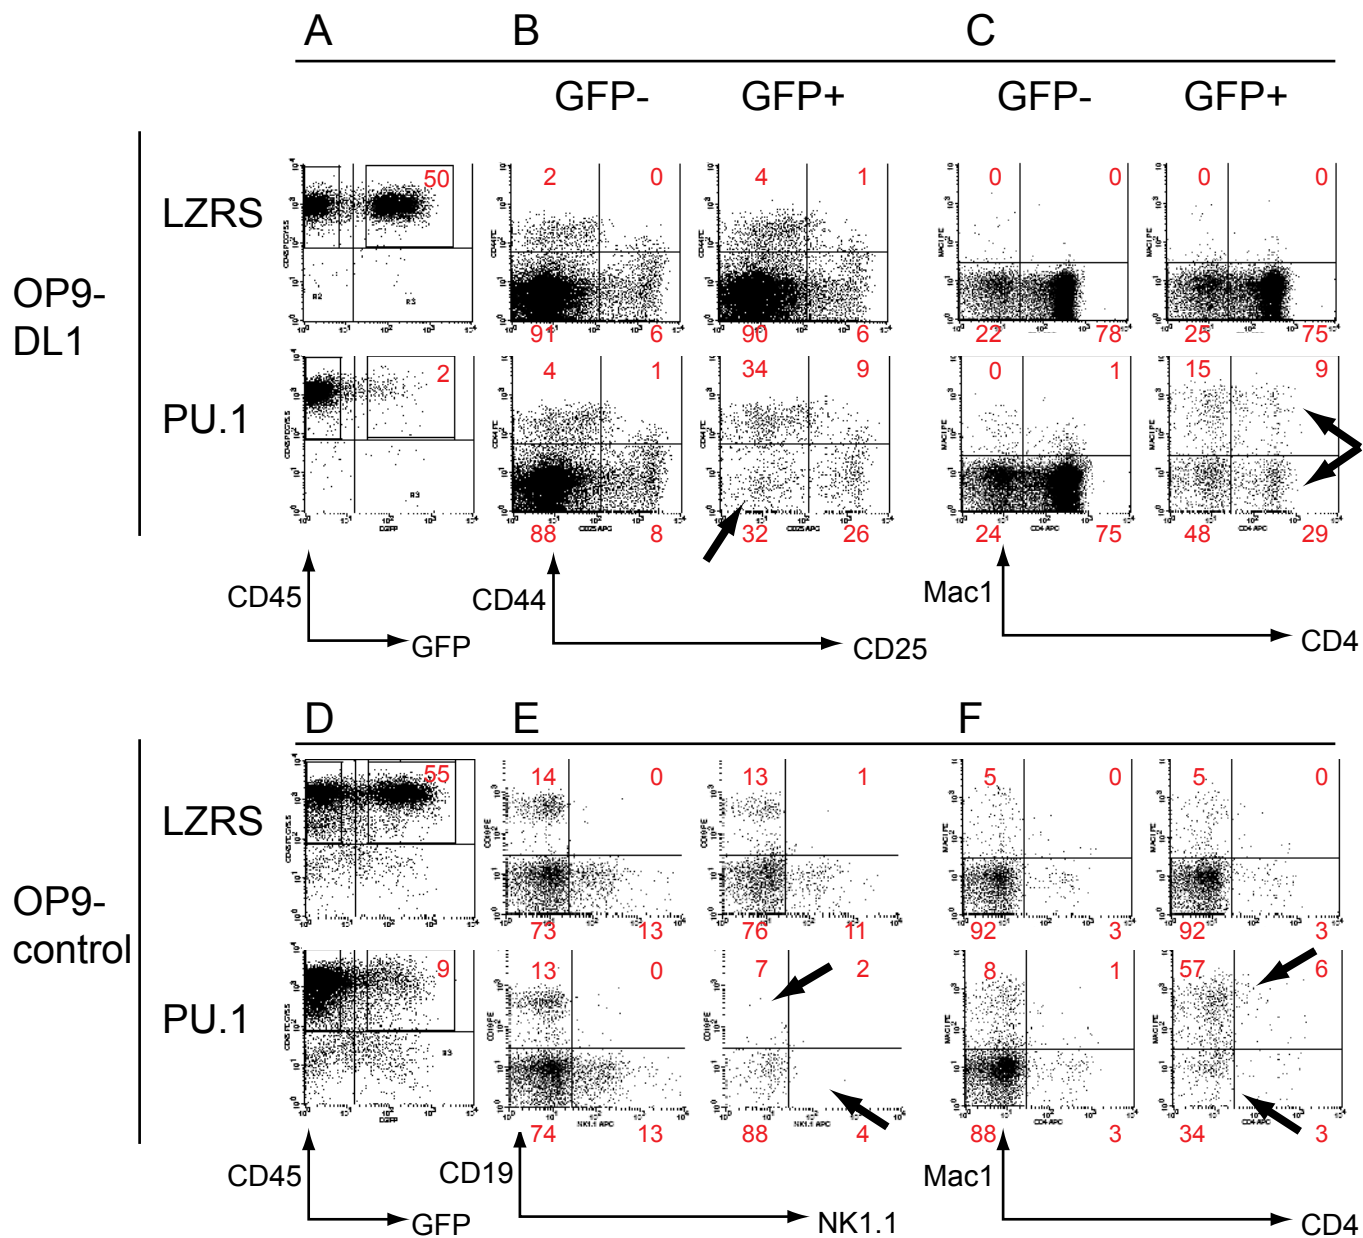

Supplement: pnas_0601188103_1.pdf [file pnas_0601188103_1.pdf]

A

Bcl2-tg FT, E15.5: 1 day in suspension  
GFP+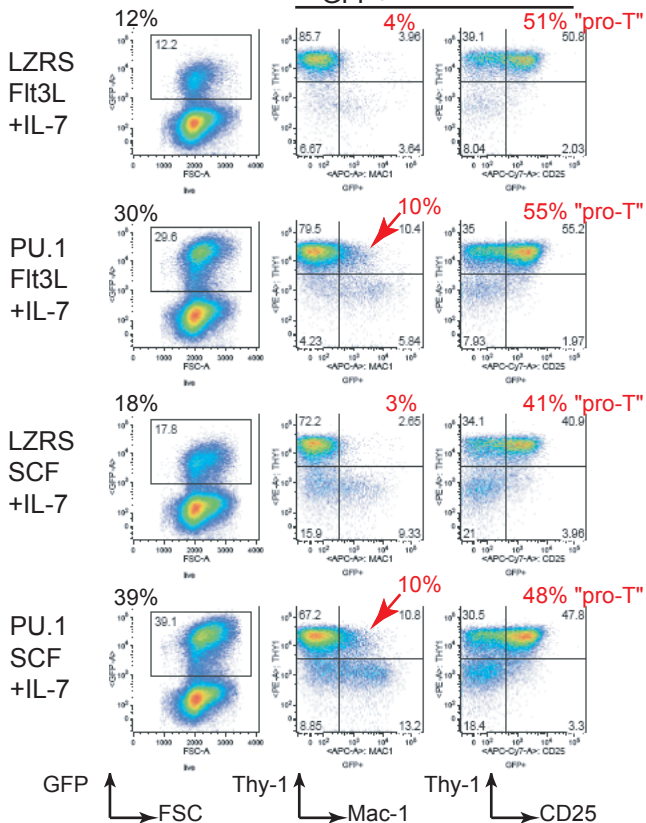

B

Bcl2-tg FT, E15.5:  
2 day suspension + Flt3L + IL-7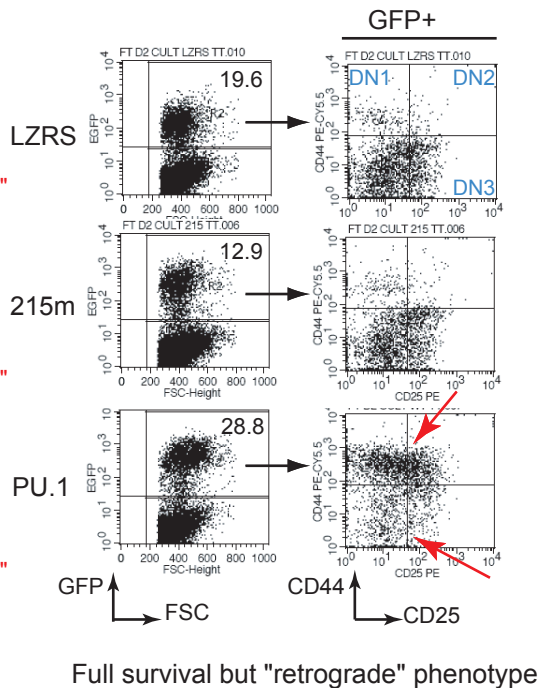

Supplement: pnas_0601188103_3.pdf [file pnas_0601188103_3.pdf]

### A Phenotype of Mac-1+ PU.1 transductants derived from Bcl2-tg fetal thymus

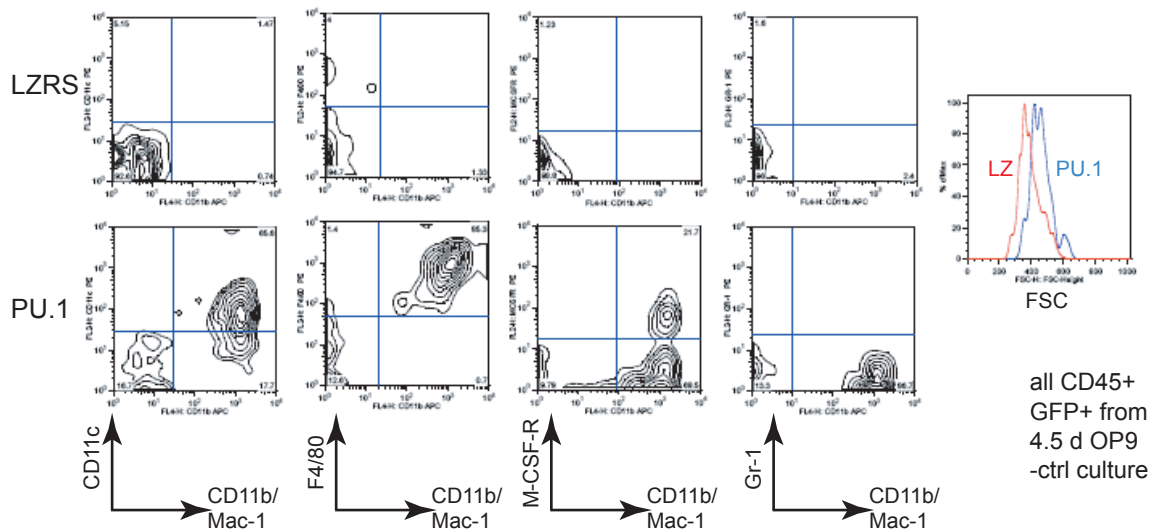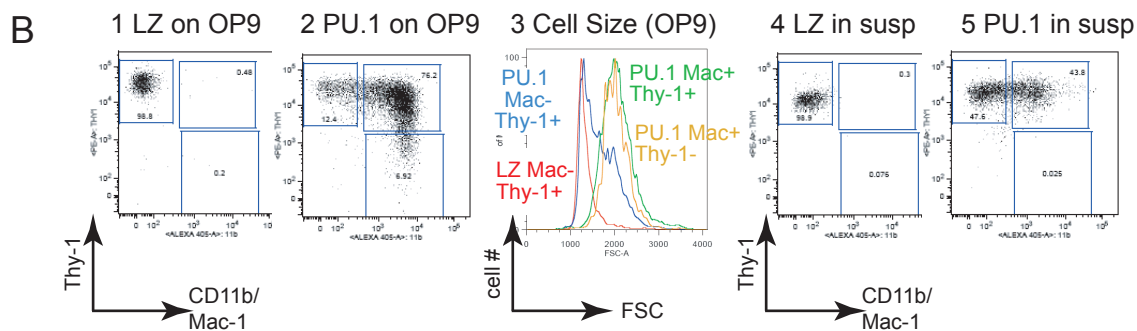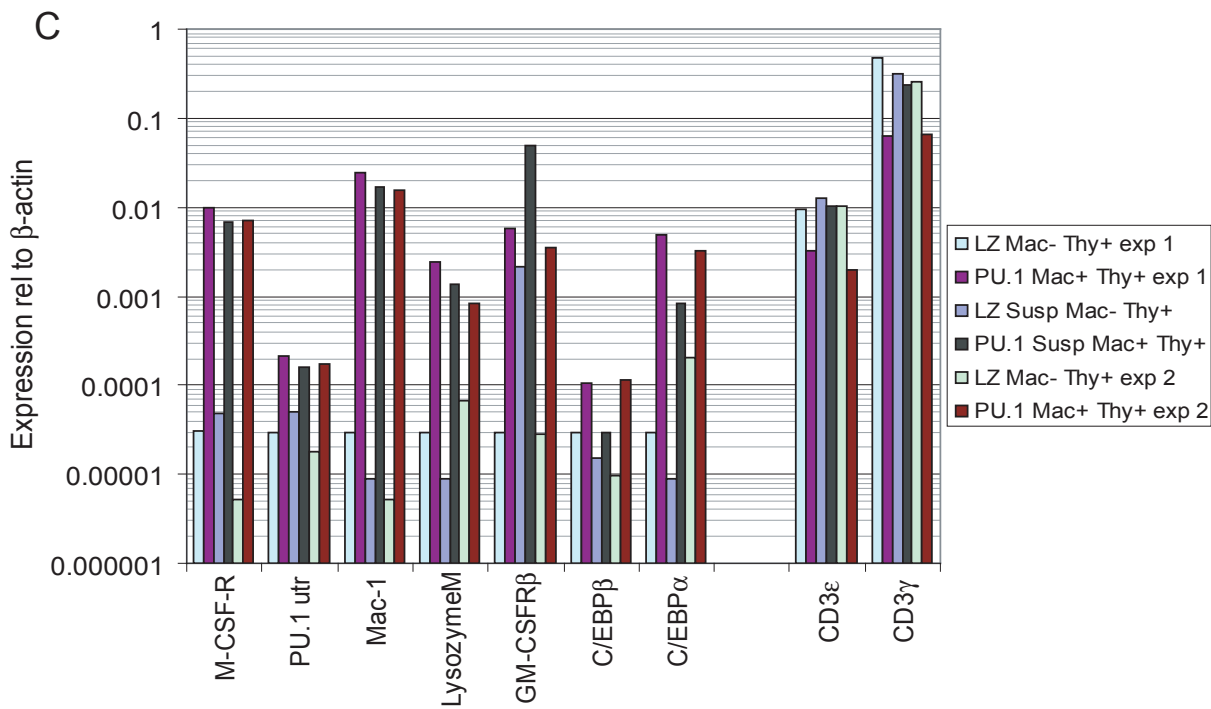

Supplement: pnas_0601188103_5.pdf [file pnas_0601188103_5.pdf]

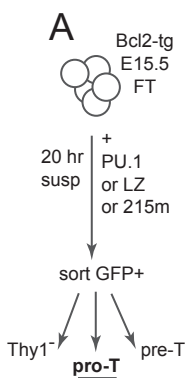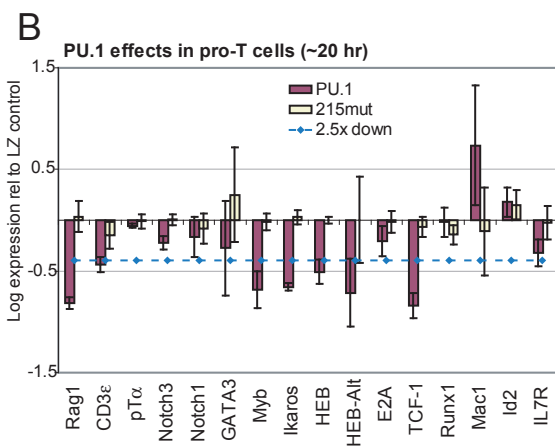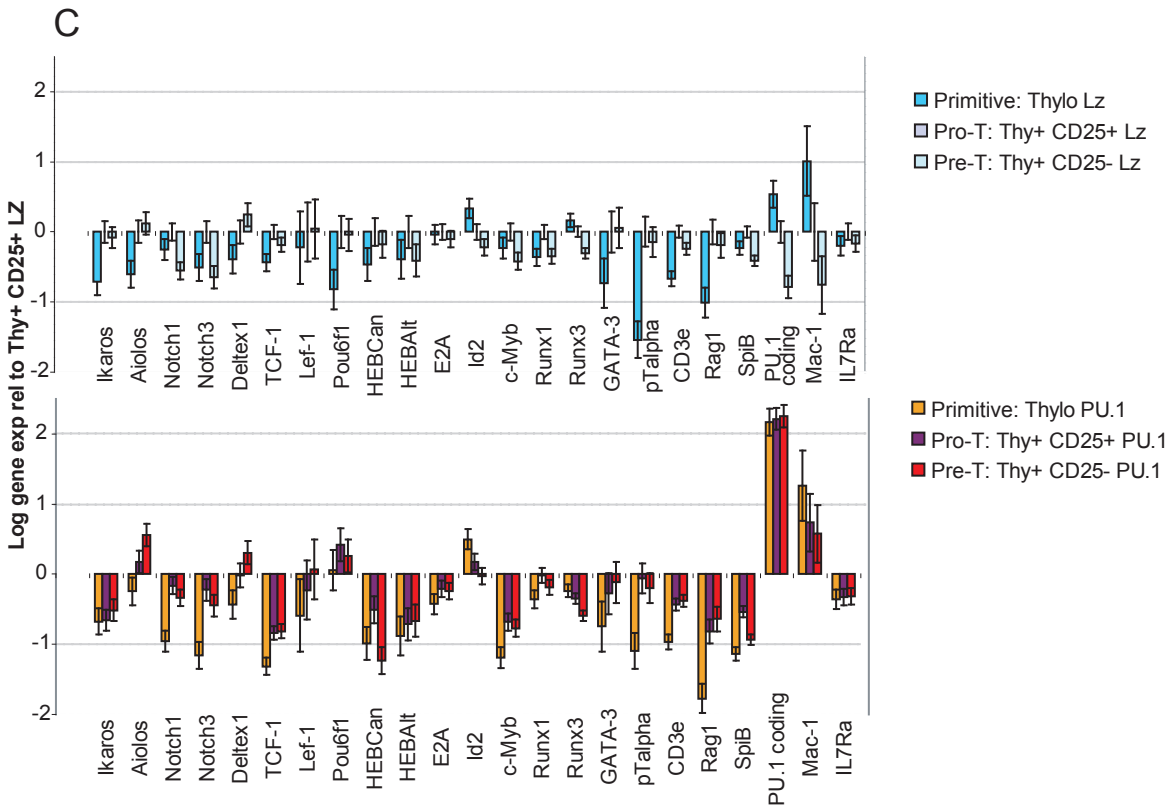

Supplement: pnas_0601188103_6.pdf [file pnas_0601188103_6.pdf]

Additional gene expression effects of PU.1 in Thy-1+ fetal thymocytes (~40 hr, +/- DL1)

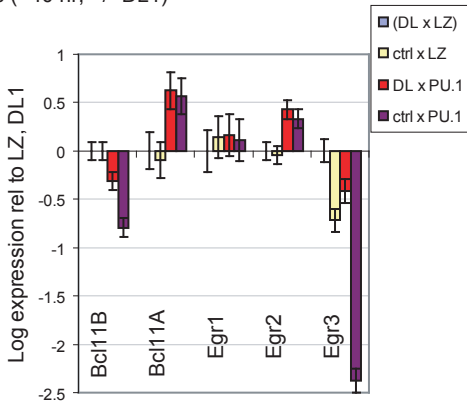

Supplement: pnas_0601188103_7.pdf [file pnas_0601188103_7.pdf]
